# Supplementary material
Source: publisher figshare collection journal article supplement (https://acs.figshare.com/ndownloader/files/5187568)
Supplement: Supplementary file 1 [file 5187568]

## **Donor-Stabilized Cations and Imine Transfer from N-Silylphosphoranimines**

Eric Rivard, Keith Huynh, Alan J. Lough and Ian Manners\*

Department of Chemistry, Davenport Laboratories, University of Toronto  
80 St. George Street, Toronto, Ontario, Canada M5S 3H6

### **Supporting Information**

- (1) Experimental Section
- (2) Table 1. Equilibrium between **[3]Cl** and free **1** and DMAP in the presence of added chloride ion
- (3) Table 2. Crystal data and structure refinement for **[3]OTf**
- (4) Table 3. Atomic coordinates and equivalent isotropic displacement parameters for **[3]OTf**
- (5) Table 4. Bond lengths and angles for **[3]OTf**
- (6) Table 5. Anisotropic parameters for **[3]OTf**
- (7) Table 6. Hydrogen coordinates and isotropic displacement parameters for **[3]OTf**

## Experimental Section

All reactions and manipulations were carried out under an atmosphere of prepurified nitrogen or argon (Air Products) using common Schlenk techniques or an inert atmosphere glove box (M-Braun). Solvents were dried and collected using a Grubbs-type solvent purification system manufactured by M-Braun.<sup>1</sup>  $^1\text{H}$  and  $^{31}\text{P}\{^1\text{H}\}$  NMR spectra were obtained on a Varian Gemini 300 spectrometer (300.1 and 121.5 MHz) and were referenced either to protic impurities in the solvent ( $^1\text{H}$ ) or externally to 85 %  $\text{H}_3\text{PO}_4$  ( $^{31}\text{P}\{^1\text{H}\}$ ) in  $\text{CDCl}_3$ ,  $\text{CD}_2\text{Cl}_2$  or  $\text{D}_2\text{O}$  (insert).  $^{13}\text{C}\{^1\text{H}\}$  and  $^{29}\text{Si}\{^1\text{H}\}$  NMR spectra were obtained on a Varian Unity 400 spectrometer (100.5 and 79.4 MHz) and were both referenced externally to  $\text{SiMe}_4$  in  $\text{CDCl}_3$ . Mass spectra were obtained with the use of a VG-250S mass spectrometer using a 70 eV electron impact ionization source. Melting points (uncorrected) were obtained in 0.5 mm (o.d.) glass capillaries which were flame sealed under nitrogen. Elemental analyses were performed at the University of Toronto using a Perkin-Elmer 2400 Series CHN Analyzer. 4-Dimethylaminopyridine (DMAP) was obtained from Aldrich and used as received. The silver salts  $\text{Ag}[\text{OTf}]$ ,  $\text{Ag}[\text{BF}_4]$  and  $\text{Ag}[\text{SbF}_6]$  were also obtained from Aldrich and were dried under dynamic vacuum at 100 °C for 24 h prior to use. Triphenylphosphine (BDH Chemicals) and tetra-*n*-octylammonium bromide (Aldrich) were dried *in vacuo* for 24 h prior to use.  $[\text{Ph}_3\text{P}=\text{N}=\text{PPh}_3]\text{Cl}$  (Aldrich) was recrystallized from  $\text{CH}_2\text{Cl}_2$  and dried *in vacuo* at 100 °C for 16 h before use. Tri-*n*-butylphosphine (Aldrich) was vacuum distilled and stored under an atmosphere of nitrogen.  $\text{Cl}_3\text{P}=\text{NSiMe}_3$  (**1**) was prepared according to a literature procedure.<sup>2</sup>

**Xray Structure Determination of [3]OTf.** Data were collected on a Nonius Kappa-CCD diffractometer using graphite-monochromated Mo  $K\alpha$  radiation ( $\lambda = 0.71073$  Å). A combination of  $1^\circ \phi$  and  $\omega$  (with  $\kappa$  offsets) scans were used to collect sufficient data. The data frames were integrated and scaled using the Denzo-SMN package.<sup>3</sup> The structures were solved and refined with the SHELXTL-PC v6.12 software package.<sup>4</sup> Refinement was by full-matrix least squares on  $F^2$  using data (including negative intensities) with hydrogen atoms bonded to carbon atoms included in calculated positions and treated as riding atoms.

**Preparation of [DMAP· $\text{Cl}_2\text{P}=\text{NSiMe}_3$ ]OSO<sub>2</sub>CF<sub>3</sub>, [3]OTf.** To a mixture of DMAP (1.06 g, 8.67 mmol) and  $\text{Ag}[\text{OSO}_2\text{CF}_3]$  (2.21 g, 8.63 mmol) in 20 mL of  $\text{CH}_2\text{Cl}_2$  was added dropwise a 3 mL solution of  $\text{Cl}_3\text{P}=\text{NSiMe}_3$  (1.94 g, 8.63 mmol) in  $\text{CH}_2\text{Cl}_2$  at 25 °C (in the absence of light). A white precipitate formed immediately and the reaction was stirred for 1 h. The reaction mixture was then filtered and slow evaporation of the filtrate under nitrogen (16 h) afforded large colorless needles of [3]OTf (3.26 g, 82 %). Attempts to generate a stable phosphoranimine cation by the treatment of **1** with  $\text{Ag}[\text{OTf}]$  in the presence of pyridine, bipyridine or without base, led to the formation of poly(dichlorophosphazene) [ $^{31}\text{P}$  NMR ( $\text{CDCl}_3$ ):  $\delta = -18.0$  ppm (s)] and  $\text{Me}_3\text{SiOTf}$  [ $^1\text{H}$  NMR ( $\text{CDCl}_3$ ):  $\delta = 0.51$  ppm (s);  $^{19}\text{F}$  NMR ( $\text{CDCl}_3$ ):  $\delta = -78.0$  ppm (s)].

Data for [3]OTf:  $^{31}\text{P}\{^1\text{H}\}$  NMR ( $\text{CDCl}_3$ ):  $\delta = -39.8$  ppm (s).  $^1\text{H}$  NMR ( $\text{CDCl}_3$ ):  $\delta = 0.30$  (s,  $\text{SiMe}_3$ , 9H), 3.51 (s,  $\text{NMe}_2$ , 6H), 7.31 (dd,  $J = 2.7$  and 8.4 Hz, *ortho*-ArH, 2H) and 8.46 ppm (dd,  $J = 7.4$  and 10.7 Hz, *meta*-ArH, 2H).  $^{13}\text{C}\{^1\text{H}\}$  NMR ( $\text{CDCl}_3$ ):  $\delta = 1.7$  (d,  $^3J_{\text{CP}} = 5.0$  Hz,  $\text{SiMe}_3$ ), 41.5 (s,  $\text{NMe}_2$ ), 108.9 (d,  $^2J_{\text{CP}} = 8.0$  Hz, *ortho*-C (DMAP)), 120.5 (q,  $^1J_{\text{CF}} = 166.1$  Hz, OTf), 138.7 (d,  $^3J_{\text{CP}} = 5.0$  Hz, *meta*-C (DMAP)) and 157.8 ppm (s, *para*-C (DMAP)).  $^{19}\text{F}$  NMR ( $\text{CDCl}_3$ ):  $\delta = -78.2$  ppm (s, OTf).  $^{29}\text{Si}\{^1\text{H}\}$  NMR ( $\text{CDCl}_3$ ):  $\delta = 2.5$  ppm (d,  $^2J_{\text{SiP}} = 11.9$  Hz). mp (°C): 98-102 (dec). EI-MS (70 eV,  $m/z$ , %): 312 ( $\text{M}^+ - \text{OTf}$ , 2), 208 ( $\text{Cl}_3\text{P}=\text{NSiMe}_3 - \text{Me}$ , 1), 189 ( $\text{Cl}_2\text{P}=\text{NSiMe}_3$ , 4), 155 ( $\text{ClP}=\text{NSiMe}_3$ , 8), 121 ( $\text{DMAP}^+$ , 100), 69 ( $\text{CF}_3^+$ , 64). Anal. Calcd. for  $\text{C}_{11}\text{H}_{19}\text{Cl}_2\text{F}_3\text{N}_3\text{O}_3\text{PSSi}$  (460.3): %C: 28.70; %H: 4.16; %N: 9.13. Found: %C: 28.50; %H: 3.98; %N: 9.05.

**Preparation of [DMAP•Cl<sub>2</sub>P=NSiMe<sub>3</sub>]Cl, [3]Cl.** To a solution of Cl<sub>3</sub>P=NSiMe<sub>3</sub> (93 mg, 0.41 mmol) in 1 mL of CH<sub>2</sub>Cl<sub>2</sub> was added dropwise a 0.5 mL solution of DMAP (47 mg, 0.38 mmol) in CH<sub>2</sub>Cl<sub>2</sub>. The resulting colorless solution was stirred for 16 h and the volatiles (including any excess Cl<sub>3</sub>P=NSiMe<sub>3</sub>) were removed *in vacuo* to give a white solid (110 mg, 82 %).

<sup>31</sup>P{<sup>1</sup>H} NMR (CDCl<sub>3</sub>): δ = -39.2 ppm (s). <sup>1</sup>H NMR (CDCl<sub>3</sub>): δ = 0.08 (s, SiMe<sub>3</sub>, 9H), 3.46 (s, NMe<sub>2</sub>, 6H), 7.65 (dd, *ortho*-ArH, 2H, *J* = 3.0 and 8.1 Hz) and 8.37 ppm (dd, *meta*-ArH, 2H, *J* = 8.4 and 10.1 Hz). <sup>13</sup>C{<sup>1</sup>H} NMR (CDCl<sub>3</sub>): δ = 1.7 (d, <sup>3</sup>*J*<sub>CP</sub> = 4.5 Hz, SiMe<sub>3</sub>), 42.1 (s, NMe<sub>2</sub>), 109.7 (d, <sup>2</sup>*J*<sub>CP</sub> = 8.6 Hz, *ortho*-C (DMAP)), 138.6 (d, <sup>3</sup>*J*<sub>CP</sub> = 5.9 Hz, *meta*-C (DMAP)) and 157.8 ppm (s, *para*-C (DMAP)). <sup>29</sup>Si{<sup>1</sup>H} NMR (CDCl<sub>3</sub>): δ = 2.4 ppm (d, <sup>2</sup>*J*<sub>SiP</sub> = 11.1 Hz).

To investigate the equilibrium nature of [3]Cl, sequential amounts of chloride ion, as [Ph<sub>3</sub>P=N=PPh<sub>3</sub>]Cl, was added to a freshly prepared solution of [3]Cl in CDCl<sub>3</sub> (see Table 1). One equiv. of bromide ion, [<sup>n</sup>Oct<sub>4</sub>N]Br, did not react with the [3]<sup>+</sup> cation.

**Preparation and Decomposition of [DMAP•Cl<sub>2</sub>P=NSiMe<sub>3</sub>]BF<sub>4</sub>, [3]BF<sub>4</sub>.** In the absence of light, a solution of Cl<sub>3</sub>P=NSiMe<sub>3</sub> (0.28 g, 0.12 mmol) in 1 mL of dichloromethane was added to a mixture of DMAP (0.15 g, 0.12 mmol) and Ag[BF<sub>4</sub>] (0.25 g, 0.13 mmol) in 2 mL of CH<sub>2</sub>Cl<sub>2</sub>. The reaction was stirred for 1 h to give a white suspension. The AgCl was filtered off and the volatiles were removed from the filtrate to give a white solid (0.31 g, 62 %) which was identified as [3]BF<sub>4</sub> by NMR spectroscopy. <sup>31</sup>P{<sup>1</sup>H} NMR (CDCl<sub>3</sub>): δ = -39.8 (s) ppm. <sup>1</sup>H NMR (CDCl<sub>3</sub>): δ = 0.25 (s, 9H, SiMe<sub>3</sub>), 3.44 (s, 6H, NMe<sub>2</sub>), 7.20 (br, 2H, *ortho* ArH) and 8.40 ppm (br, *meta* ArH). <sup>19</sup>F NMR (CDCl<sub>3</sub>): δ = -151.4 ppm (pseudoquartet, BF<sub>4</sub><sup>-</sup>).

Compound [3]BF<sub>4</sub> gradually decomposed over the period of 3 days in CDCl<sub>3</sub> to give [Cl<sub>2</sub>P=N]<sub>3</sub> and DMAP•BF<sub>3</sub> (see below).

Data for decomposition products: <sup>31</sup>P{<sup>1</sup>H} NMR (CDCl<sub>3</sub>): δ = 20.0 ppm (s, [Cl<sub>2</sub>P=N]<sub>3</sub>). <sup>1</sup>H NMR (CDCl<sub>3</sub>): δ = 3.20 (s, 6H, NMe<sub>2</sub>), 6.66 (d, 2H, *ortho* ArH, *J* = 7.0 Hz) and 8.1 ppm (br, *meta* ArH). <sup>19</sup>F NMR (CDCl<sub>3</sub>): δ = -151.6 ppm (m). <sup>11</sup>B NMR (CDCl<sub>3</sub>): δ = -0.02 (br). Lit. for DMAP•BF<sub>3</sub>:<sup>5</sup> <sup>1</sup>H NMR (CDCl<sub>3</sub>): δ = 3.16 (s), 6.61 (d, *J* = 7.0 Hz) and 8.09 ppm (br). <sup>19</sup>F NMR (CDCl<sub>3</sub>): δ = -152.7 ppm (m). <sup>11</sup>B NMR (CDCl<sub>3</sub>): δ = 0.34 ppm (br).

**In Situ Preparation of [DMAP•Cl<sub>2</sub>P=NSiMe<sub>3</sub>]SbF<sub>6</sub>, [3]SbF<sub>6</sub>.** In the absence of light, a 0.5 mL solution of **1** (90 mg, 0.40 mmol) in CDCl<sub>3</sub> was added quickly to a stirred mixture of Ag[SbF<sub>6</sub>] (138 mg, 0.40 mmol) and DMAP (49 mg, 0.40 mmol) in 1 mL of CDCl<sub>3</sub>. The resulting grey suspension was stirred for 1 h and the AgCl was filtered off. Analysis of the resulting colorless filtrate by NMR indicated the formation of [3]SbF<sub>6</sub> (95 % pure; trace of unreacted **1**, <sup>31</sup>P: -54.0 ppm (s), was present). Compound [3]SbF<sub>6</sub> was stable in solution for up to two weeks without any noticeable sign of decomposition.

<sup>31</sup>P{<sup>1</sup>H} NMR (CDCl<sub>3</sub>): δ = -40.2 ppm (s). <sup>1</sup>H NMR (CDCl<sub>3</sub>): δ = 0.24 (s, 9H, SiMe<sub>3</sub>), 3.38 (s, 6H, NMe<sub>2</sub>), 7.04 (dd, 2H, *ortho* ArH, *J* = 3.2 and 7.1 Hz) and 8.34 ppm (dd, *meta* ArH, *J* = 8.1 and 11.1 Hz). <sup>19</sup>F NMR (CDCl<sub>3</sub>): δ = -110 (very broad) and -135 ppm (very broad) (SbF<sub>6</sub><sup>-</sup>).

**Preparation of Ph<sub>3</sub>P=N-PCl<sub>2</sub> (7) from Ph<sub>3</sub>P and Cl<sub>3</sub>P=NSiMe<sub>3</sub>.** A solution of Ph<sub>3</sub>P (0.34 g, 1.3 mmol) in 3 mL of CH<sub>2</sub>Cl<sub>2</sub> was added to a solution of **1** (0.29 g, 1.3 mmol) in 2 mL of CH<sub>2</sub>Cl<sub>2</sub>. The reaction was stirred for 3 h and removal of the volatiles afforded a white solid which was characterized as the previously known phosphoranimine Ph<sub>3</sub>P=N-PCl<sub>2</sub> (**7**)<sup>6</sup> (0.43 g, 89 %). Repeating the reaction in CDCl<sub>3</sub> also identified ClSiMe<sub>3</sub> as a byproduct [<sup>1</sup>H NMR: δ = 0.45 ppm (s)].

Data for **7**:  $^{31}\text{P}$  NMR ( $\text{CDCl}_3$ ):  $\delta = 165.6$  (d,  $^2J_{\text{PP}} = 75.0$  Hz,  $-\text{PCl}_2$ ) and  $15.8$  ppm (d,  $^2J_{\text{PP}} = 75.0$  Hz,  $\text{Ph}_3\text{P}=\text{N}-$ ).  $^1\text{H}$  NMR ( $\text{CDCl}_3$ ):  $\delta = 7.5 - 8.0$  ppm (m).

**In Situ Preparation of  $^{\text{t}}\text{Bu}_3\text{P}=\text{N}-\text{PCl}_2$  (**8**) from  $^{\text{t}}\text{Bu}_3\text{P}$  and  $\text{Cl}_3\text{P}=\text{NSiMe}_3$ .** To a solution of **1** (0.52 g, 2.3 mmol) in 5 mL of  $\text{CH}_2\text{Cl}_2$  was added  $^{\text{t}}\text{Bu}_3\text{P}$  (0.60 mL, 2.4 mmol) dropwise. Analysis of the resulting yellow solution after 2 h revealed the formation of  $\text{PCl}_3$  ( $\delta = 218.0$  ppm (s); *ca.* 5 %),  $^{\text{t}}\text{Bu}_3\text{P}=\text{NSiMe}_3$  ( $\delta = -8.8$  ppm (s); *ca.* 5 %),  $^{\text{t}}\text{Bu}_3\text{P}=\text{N}-\text{PCl}_2$  (**8**) [ $\delta = 158.0$  (d,  $^2J_{\text{PP}} = 85.0$  Hz,  $-\text{PCl}_2$ ) and  $40.7$  ppm (d,  $^2J_{\text{PP}} = 85.0$  Hz,  $^{\text{t}}\text{Bu}_3\text{P}=\text{N}-$ ); 1:1 ratio; *ca.* 55 %] and an unidentified species at  $\delta = 105.1$  (s, *ca.* 25 %) and  $35.1$  ppm (s, *ca.* 10 %). Stirring the reaction for further 6 days gave an 80 % (*in situ*) yield of  $^{\text{t}}\text{Bu}_3\text{P}=\text{N}-\text{PCl}_2$ <sup>7</sup> and unknown species (*ca.* 20 %) with  $^{31}\text{P}$  NMR resonances at  $\delta = 72$  (br) and  $35$  ppm (s). Attempts to isolate pure **8** have yet to be successful.

#### References:

- (1) Pangborn, A. B.; Giardello, M. A.; Grubbs, R. H.; Rosen, R. K.; Timmers, F. J. *Organometallics* **1996**, *15*, 1518.
- (2) Wang, B.; Rivard, E.; Manners, I. *Inorg. Chem.* **2002**, *41*, 1690.
- (3) Otwinowski, Z.; Minor, W. *Methods Enzymol.* **1997**, *276*, 367.
- (4) Sheldrick, G. M. SHELXTL-Windows NT. V6.12, Bruker Analytical X-Ray Systems Inc., Madison, WI, 2001.
- (5) Lesley, M. J. G.; Woodward, A.; Taylor, N. J.; Marder, T. M.; Cazenobe, I.; Ledoux, I.; Zyss, J.; Thornton, A.; Bruce, D. W.; Kakkar, A. K. *Chem. Mater.* **1998**, *10*, 1355.
- (6) Riesel, L.; Friebe, R. Z. *Anorg. Allg. Chem.* **1981**, *474*, 105
- (7) Riesel, L.; Friebe, R. Z. *Anorg. Allg. Chem.* **1991**, *604*, 85.

**Table 1** Equilibrium between **[3]Cl** and free **1** and DMAP in the presence of added chloride ion<sup>a</sup>

| Molar equiv.<br>Cl <sub>3</sub> P=NSiMe <sub>3</sub> <sup>b</sup><br>of chloride <sup>c</sup> | Mol % of <b>[3]Cl</b> <sup>b</sup> | Mol % of |
|-----------------------------------------------------------------------------------------------|------------------------------------|----------|
| 0                                                                                             | 95                                 | 5        |
| 0.25                                                                                          | 80                                 | 20       |
| 0.5                                                                                           | 60                                 | 40       |
| 0.75                                                                                          | 25                                 | 75       |
| 1.0                                                                                           | 0                                  | 100      |

<sup>a</sup>As determined by <sup>31</sup>P NMR spectroscopy. <sup>b</sup>Initial concentration of **[3]Cl** (0.3 – 0.4 M); reaction time, 1.5 h. <sup>c</sup>Source of chloride: [Ph<sub>3</sub>P=N=PPh<sub>3</sub>]Cl.

**Table 2.** Crystal data and structure refinement for [3]OTf.

|                                   |                                             |                                |
|-----------------------------------|---------------------------------------------|--------------------------------|
| Identification code               | k0384                                       |                                |
| Empirical formula                 | C11 H19 Cl2 F3 N3 O3 P S Si                 |                                |
| Formula weight                    | 460.31                                      |                                |
| Temperature                       | 150(1) K                                    |                                |
| Wavelength                        | 0.71073 Å                                   |                                |
| Crystal system                    | Triclinic                                   |                                |
| Space group                       | P-1                                         |                                |
| Unit cell dimensions              | a = 8.0840(4) Å                             | $\alpha = 88.5630(19)^\circ$ . |
|                                   | b = 8.6430(4) Å                             | $\beta = 86.5950(18)^\circ$ .  |
|                                   | c = 14.6080(7) Å                            | $\gamma = 85.038(2)^\circ$ .   |
| Volume                            | 1014.84(8) Å <sup>3</sup>                   |                                |
| Z                                 | 2                                           |                                |
| Density (calculated)              | 1.506 Mg/m <sup>3</sup>                     |                                |
| Absorption coefficient            | 0.602 mm <sup>-1</sup>                      |                                |
| F(000)                            | 472                                         |                                |
| Crystal size                      | 0.24 x 0.16 x 0.08 mm <sup>3</sup>          |                                |
| Theta range for data collection   | 2.77 to 27.54°.                             |                                |
| Index ranges                      | -10 ≤ h ≤ 10, -11 ≤ k ≤ 11, -18 ≤ l ≤ 18    |                                |
| Reflections collected             | 13104                                       |                                |
| Independent reflections           | 4659 [R(int) = 0.0986]                      |                                |
| Completeness to theta = 27.54°    | 99.5 %                                      |                                |
| Absorption correction             | Semi-empirical from equivalents             |                                |
| Max. and min. transmission        | 0.970 and 0.783                             |                                |
| Refinement method                 | Full-matrix least-squares on F <sup>2</sup> |                                |
| Data / restraints / parameters    | 4659 / 0 / 232                              |                                |
| Goodness-of-fit on F <sup>2</sup> | 0.987                                       |                                |
| Final R indices [I > 2σ(I)]       | R1 = 0.0550, wR2 = 0.1243                   |                                |
| R indices (all data)              | R1 = 0.1090, wR2 = 0.1513                   |                                |
| Extinction coefficient            | 0.005(2)                                    |                                |
| Largest diff. peak and hole       | 0.451 and -0.535 e.Å <sup>-3</sup>          |                                |

**Table 3.** Atomic coordinates ( $\times 10^4$ ) and equivalent isotropic displacement parameters ( $\text{\AA}^2 \times 10^3$ ) for **[3]OTf**.  $U(\text{eq})$  is defined as one third of the trace of the orthogonalized  $U^{ij}$  tensor.

|       | x        | y        | z        | U(eq) |
|-------|----------|----------|----------|-------|
| Cl(1) | 2350(1)  | 3626(1)  | 6608(1)  | 37(1) |
| Cl(2) | 5498(1)  | 4335(1)  | 7610(1)  | 38(1) |
| P(1)  | 4565(1)  | 2644(1)  | 6939(1)  | 28(1) |
| Si(1) | 6815(1)  | 2056(1)  | 5196(1)  | 29(1) |
| N(1)  | 4045(3)  | 1394(3)  | 7818(2)  | 25(1) |
| N(2)  | 3097(3)  | -1681(3) | 9967(2)  | 27(1) |
| N(3)  | 5660(4)  | 1814(4)  | 6219(2)  | 32(1) |
| C(1)  | 3033(4)  | 1869(4)  | 8581(2)  | 29(1) |
| C(2)  | 2718(4)  | 895(4)   | 9285(2)  | 27(1) |
| C(3)  | 3394(4)  | -679(4)  | 9288(2)  | 24(1) |
| C(4)  | 4441(4)  | -1141(4) | 8492(2)  | 31(1) |
| C(5)  | 4741(4)  | -121(4)  | 7808(2)  | 31(1) |
| C(7)  | 1982(5)  | -1292(5) | 10774(2) | 35(1) |
| C(8)  | 3730(5)  | -3335(4) | 9891(3)  | 33(1) |
| C(9)  | 7726(5)  | 112(4)   | 4841(3)  | 39(1) |
| C(10) | 5420(5)  | 2895(5)  | 4316(3)  | 40(1) |
| C(11) | 8467(5)  | 3337(5)  | 5392(3)  | 40(1) |
| S(1)  | 9386(1)  | -3591(1) | 8633(1)  | 30(1) |
| F(1)  | 8649(3)  | -1395(3) | 7411(2)  | 62(1) |
| F(2)  | 11106(3) | -2527(3) | 7206(2)  | 65(1) |
| F(3)  | 9035(4)  | -3691(3) | 6860(2)  | 69(1) |
| O(1)  | 10414(4) | -5033(3) | 8570(2)  | 52(1) |
| O(2)  | 10004(3) | -2411(3) | 9165(2)  | 42(1) |
| O(3)  | 7630(3)  | -3736(3) | 8780(2)  | 41(1) |
| C(12) | 9543(5)  | -2770(5) | 7473(3)  | 41(1) |

**Table 4.** Bond lengths [ $\text{\AA}$ ] and angles [ $^\circ$ ] for **[3]OTf**.

|                  |            |
|------------------|------------|
| Cl(1)-P(1)       | 1.9947(12) |
| Cl(2)-P(1)       | 2.0040(13) |
| P(1)-N(3)        | 1.490(3)   |
| P(1)-N(1)        | 1.713(3)   |
| Si(1)-N(3)       | 1.733(3)   |
| Si(1)-C(11)      | 1.846(4)   |
| Si(1)-C(9)       | 1.849(4)   |
| Si(1)-C(10)      | 1.854(4)   |
| N(1)-C(5)        | 1.380(4)   |
| N(1)-C(1)        | 1.392(4)   |
| N(2)-C(3)        | 1.325(4)   |
| N(2)-C(7)        | 1.468(4)   |
| N(2)-C(8)        | 1.480(4)   |
| C(1)-C(2)        | 1.339(5)   |
| C(2)-C(3)        | 1.422(5)   |
| C(3)-C(4)        | 1.440(5)   |
| C(4)-C(5)        | 1.341(5)   |
| S(1)-O(2)        | 1.438(3)   |
| S(1)-O(1)        | 1.439(3)   |
| S(1)-O(3)        | 1.439(3)   |
| S(1)-C(12)       | 1.822(4)   |
| F(1)-C(12)       | 1.341(4)   |
| F(2)-C(12)       | 1.333(4)   |
| F(3)-C(12)       | 1.318(5)   |
| N(3)-P(1)-N(1)   | 110.73(15) |
| N(3)-P(1)-Cl(1)  | 118.92(13) |
| N(1)-P(1)-Cl(1)  | 102.36(10) |
| N(3)-P(1)-Cl(2)  | 117.90(13) |
| N(1)-P(1)-Cl(2)  | 101.91(11) |
| Cl(1)-P(1)-Cl(2) | 102.68(6)  |
| N(3)-Si(1)-C(11) | 108.60(17) |
| N(3)-Si(1)-C(9)  | 107.37(17) |
| C(11)-Si(1)-C(9) | 110.65(18) |



|                   |            |
|-------------------|------------|
| N(3)-Si(1)-C(10)  | 109.16(16) |
| C(11)-Si(1)-C(10) | 111.36(18) |
| C(9)-Si(1)-C(10)  | 109.60(19) |
| C(5)-N(1)-C(1)    | 117.9(3)   |
| C(5)-N(1)-P(1)    | 119.3(2)   |
| C(1)-N(1)-P(1)    | 122.6(2)   |
| C(3)-N(2)-C(7)    | 123.3(3)   |
| C(3)-N(2)-C(8)    | 120.5(3)   |
| C(7)-N(2)-C(8)    | 115.8(3)   |
| P(1)-N(3)-Si(1)   | 144.1(2)   |
| C(2)-C(1)-N(1)    | 121.7(3)   |
| C(1)-C(2)-C(3)    | 121.6(3)   |
| N(2)-C(3)-C(2)    | 123.4(3)   |
| N(2)-C(3)-C(4)    | 121.0(3)   |
| C(2)-C(3)-C(4)    | 115.6(3)   |
| C(5)-C(4)-C(3)    | 120.8(3)   |
| C(4)-C(5)-N(1)    | 122.3(3)   |
| O(2)-S(1)-O(1)    | 115.75(18) |
| O(2)-S(1)-O(3)    | 114.50(16) |
| O(1)-S(1)-O(3)    | 115.36(18) |
| O(2)-S(1)-C(12)   | 102.37(19) |
| O(1)-S(1)-C(12)   | 103.64(17) |
| O(3)-S(1)-C(12)   | 102.51(17) |
| F(3)-C(12)-F(2)   | 106.1(3)   |
| F(3)-C(12)-F(1)   | 108.0(3)   |
| F(2)-C(12)-F(1)   | 106.7(3)   |
| F(3)-C(12)-S(1)   | 112.5(3)   |
| F(2)-C(12)-S(1)   | 111.8(3)   |
| F(1)-C(12)-S(1)   | 111.4(3)   |

---

Symmetry transformations used to generate equivalent atoms:

**Table 5.** Anisotropic displacement parameters ( $\text{\AA}^2 \times 10^3$ ) for **[3]OTf**. The anisotropic displacement factor exponent takes the form:  $-2\pi^2 [h^2 a^{*2} U^{11} + \dots + 2 h k a^* b^* U^{12}]$

|       | $U^{11}$ | $U^{22}$ | $U^{33}$ | $U^{23}$ | $U^{13}$ | $U^{12}$ |
|-------|----------|----------|----------|----------|----------|----------|
| Cl(1) | 32(1)    | 40(1)    | 38(1)    | 3(1)     | -4(1)    | 6(1)     |
| Cl(2) | 49(1)    | 35(1)    | 33(1)    | 3(1)     | -6(1)    | -14(1)   |
| P(1)  | 28(1)    | 28(1)    | 26(1)    | 3(1)     | 0(1)     | -3(1)    |
| Si(1) | 26(1)    | 32(1)    | 28(1)    | 0(1)     | 3(1)     | -4(1)    |
| N(1)  | 29(2)    | 22(1)    | 25(2)    | -4(1)    | 3(1)     | 0(1)     |
| N(2)  | 29(2)    | 25(2)    | 27(2)    | 0(1)     | 1(1)     | 1(1)     |
| N(3)  | 30(2)    | 35(2)    | 30(2)    | 3(1)     | 4(1)     | -2(1)    |
| C(1)  | 25(2)    | 28(2)    | 32(2)    | 1(2)     | 3(1)     | 1(2)     |
| C(2)  | 27(2)    | 25(2)    | 28(2)    | -3(2)    | 5(1)     | -2(2)    |
| C(3)  | 22(2)    | 26(2)    | 24(2)    | 0(1)     | -1(1)    | -3(1)    |
| C(4)  | 29(2)    | 24(2)    | 36(2)    | 0(2)     | 5(2)     | 4(2)     |
| C(5)  | 31(2)    | 27(2)    | 32(2)    | -2(2)    | 6(2)     | 1(2)     |
| C(7)  | 34(2)    | 42(2)    | 29(2)    | 6(2)     | 3(2)     | -3(2)    |
| C(8)  | 39(2)    | 23(2)    | 37(2)    | 3(2)     | -1(2)    | 0(2)     |
| C(9)  | 35(2)    | 37(2)    | 46(2)    | -6(2)    | 6(2)     | -4(2)    |
| C(10) | 41(2)    | 46(2)    | 32(2)    | 7(2)     | 2(2)     | -9(2)    |
| C(11) | 35(2)    | 45(2)    | 41(2)    | -4(2)    | 0(2)     | -13(2)   |
| S(1)  | 28(1)    | 31(1)    | 29(1)    | -2(1)    | 3(1)     | 2(1)     |
| F(1)  | 71(2)    | 57(2)    | 51(2)    | 21(1)    | 11(1)    | 18(1)    |
| F(2)  | 46(2)    | 82(2)    | 61(2)    | 14(2)    | 27(1)    | -5(1)    |
| F(3)  | 88(2)    | 85(2)    | 34(1)    | -12(1)   | -2(1)    | -14(2)   |
| O(1)  | 59(2)    | 40(2)    | 51(2)    | -1(1)    | 6(1)     | 25(2)    |
| O(2)  | 39(2)    | 49(2)    | 40(2)    | -12(1)   | -3(1)    | -9(1)    |
| O(3)  | 29(1)    | 49(2)    | 45(2)    | 5(1)     | 6(1)     | -8(1)    |
| C(12) | 37(2)    | 47(2)    | 36(2)    | 1(2)     | 8(2)     | 6(2)     |

**Table 6.** Hydrogen coordinates ( $\times 10^4$ ) and isotropic displacement parameters ( $\text{\AA}^2 \times 10^{-3}$ ) for k0384.

|        | x    | y     | z     | U(eq) |
|--------|------|-------|-------|-------|
| H(1A)  | 2552 | 2911  | 8603  | 34    |
| H(2A)  | 2027 | 1266  | 9796  | 32    |
| H(4A)  | 4924 | -2180 | 8452  | 37    |
| H(5A)  | 5459 | -453  | 7299  | 37    |
| H(7A)  | 1478 | -226  | 10705 | 53    |
| H(7B)  | 2619 | -1380 | 11326 | 53    |
| H(7C)  | 1106 | -2011 | 10828 | 53    |
| H(8A)  | 4946 | -3414 | 9807  | 50    |
| H(8B)  | 3262 | -3784 | 9365  | 50    |
| H(8C)  | 3400 | -3902 | 10453 | 50    |
| H(9A)  | 8376 | -372  | 5334  | 59    |
| H(9B)  | 8453 | 215   | 4285  | 59    |
| H(9C)  | 6833 | -537  | 4716  | 59    |
| H(10A) | 4903 | 3907  | 4517  | 59    |
| H(10B) | 4553 | 2195  | 4230  | 59    |
| H(10C) | 6066 | 3028  | 3734  | 59    |
| H(11A) | 9154 | 2885  | 5878  | 60    |
| H(11B) | 7961 | 4362  | 5577  | 60    |
| H(11C) | 9163 | 3445  | 4825  | 60    |
